# Supplementary material for: Tank fouling community enhances coral microfragment growth
Source: PeerJ. 2023 Aug 7;11:e15723. doi: 10.7717/peerj.15723 (PMC10414021; doi:10.7717/peerj.15723)
Supplement: Data S1 [file peerj-11-15723-s002.xlsx]

## Sheet: Figure 2 Data
								Microfragment Growth Versus Husbandry Method
		# Unique Genotypes	Genotype #	Husbandry+Season+Year	Days from Microfragging to Polyp Growth		# Unique Genotypes	Genotype #	Husbandry+Season+Year	Days from Microfragging to Polyp Growth		# Unique Genotypes	Genotype #	Husbandry+Season+Year	Days from Microfragging to Polyp Growth		# Unique Genotypes	Genotype #	Husbandry+Season+Year	Days from Microfragging to Polyp Growth
				Mini Reef*					Clean Start					Green Film Winter					Green Film Summer
		1	26	Mini Reef OS Tank 6 2020	74		1	29	Clean start Summer 2020	35		1	78	Green film Winter 2020	17		1	79	Green film Summer 2020	47
		2	20	Mini Reef OS Tank 6 2020	89			29	Clean start Summer 2020	35			78	Green film Winter 2020	24			79	Green film Summer 2020	25
			20	Mini Reef OS Tank 6 2020	96			29	Clean start Summer 2020	35			78	Green film Winter 2020	24			79	Green film Summer 2020	32
			20	Mini Reef OS Tank 6 2020	96		2	30	Clean start Summer 2020	42		2	82	Green film Winter 2020	17			79	Green film Summer 2020	34
			20	Mini Reef OS Tank 6 2020	96			30	Clean start Summer 2020	42			82	Green film Winter 2020	17			79	Green film Summer 2020	34
			20	Mini Reef OS Tank 6 2020	96		3	31	Clean start Summer 2020	35		3	86	Green film Winter 2020	31			79	Green film Summer 2020	35
		3	23	Mini Reef OS Tank 6 2020	96			31	Clean start Summer 2020	49			86	Green film Winter 2020	24		2	80	Green film Summer 2020	47
								31	Clean start Summer 2020	49			86	Green film Winter 2020	24			80	Green film Summer 2020	47
				Mean	91.8571		4	33	Clean start Summer 2020	35		4	87	Green film Winter 2020	31			80	Green film Summer 2020	47
				Count of Fragments	7			33	Clean start Summer 2020	49			87	Green film Winter 2020	31			80	Green film Summer 2020	47
				Genotypes	3			33	Clean start Summer 2020	49			87	Green film Winter 2020	31			80	Green film Summer 2020	40
								33	Clean start Summer 2020	70		5	88	Green film Winter 2021	33			80	Green film Summer 2020	40
							5	35	Clean start Summer 2020	40			88	Green film Winter 2021	33			80	Green film Summer 2020	48
				* Only one tank used (Feb to Apr 2020)				35	Clean start Summer 2020	40			88	Green film Winter 2021	24			80	Green film Summer 2020	48
							6	36	Clean start Summer 2020	54			88	Green film Winter 2021	24			80	Green film Summer 2020	40
								36	Clean start Summer 2020	54			88	Green film Winter 2021	24			80	Green film Summer 2020	48
							7	43	Clean start Summer 2020	32			88	Green film Winter 2021	24			80	Green film Summer 2020	48
								43	Clean start Summer 2020	32			88	Green film Winter 2021	24		3	81	Green film Summer 2020	54
								43	Clean start Summer 2020	40			88	Green film Winter 2021	24			81	Green film Summer 2020	54
							8	44	Clean start Summer 2020	32			88	Green film Winter 2021	24			81	Green film Summer 2020	54
								44	Clean start Summer 2020	32		6	89	Green film Winter 2021	23			81	Green film Summer 2020	54
								44	Clean start Summer 2020	32			89	Green film Winter 2021	23		4	82	Green film Summer 2020	31
								44	Clean start Summer 2020	40		7	90	Green film Winter 2021	26			82	Green film Summer 2020	39
								44	Clean start Summer 2020	40			90	Green film Winter 2021	26			82	Green film Summer 2020	39
								44	Clean start Summer 2020	40			90	Green film Winter 2021	26			82	Green film Summer 2020	39
								44	Clean start Summer 2020	46		8	91	Green film Winter 2021	26			82	Green film Summer 2020	47
								44	Clean start Summer 2020	46			91	Green film Winter 2021	26			82	Green film Summer 2020	47
								44	Clean start Summer 2020	46			91	Green film Winter 2021	26			82	Green film Summer 2020	47
								44	Clean start Summer 2020	47		9	92	Green film Winter 2021	17			82	Green film Summer 2020	47
								44	Clean start Summer 2020	47			92	Green film Winter 2021	17		5	107	Green film Summer 2021	32
								44	Clean start Summer 2020	60			92	Green film Winter 2021	17			107	Green film Summer 2021	32
								44	Clean start Summer 2020	60		10	93	Green film Winter 2021	27		6	108	Green film Summer 2021	25
								44	Clean start Summer 2020	60			93	Green film Winter 2021	33			108	Green film Summer 2021	25
							9	46	Clean start Summer 2020	39			93	Green film Winter 2021	33			108	Green film Summer 2021	25
								46	Clean start Summer 2020	40			93	Green film Winter 2021	27			108	Green film Summer 2021	25
								46	Clean start Summer 2020	40			93	Green film Winter 2021	33		7	109	Green film Summer 2021	26
								46	Clean start Summer 2020	40		11	94	Green film Winter 2021	27		8	110	Green film Summer 2021	26
								46	Clean start Summer 2020	40			94	Green film Winter 2021	27			110	Green film Summer 2021	26
								46	Clean start Summer 2020	40			94	Green film Winter 2021	27			110	Green film Summer 2021	26
								46	Clean start Summer 2020	47			94	Green film Winter 2021	27			110	Green film Summer 2021	26
								46	Clean start Summer 2020	47			94	Green film Winter 2021	40			110	Green film Summer 2021	26
								46	Clean start Summer 2020	47		12	95	Green film Winter 2021	35		9	112	Green film Summer 2021	21
							10	47	Clean start Summer 2020	40			96	Green film Winter 2021	31			112	Green film Summer 2021	21
								47	Clean start Summer 2020	40		13	96	Green film Winter 2021	31			112	Green film Summer 2021	34
								47	Clean start Summer 2020	40			96	Green film Winter 2021	31			112	Green film Summer 2021	40
								47	Clean start Summer 2020	46			96	Green film Winter 2021	38			112	Green film Summer 2021	34
								47	Clean start Summer 2020	46			96	Green film Winter 2021	38			112	Green film Summer 2021	35
								47	Clean start Summer 2020	46			96	Green film Winter 2021	38			112	Green film Summer 2021	42
							11	49	Clean start Summer 2020	39			96	Green film Winter 2021	19		10	113	Green film Summer 2021	42
								49	Clean start Summer 2020	39			96	Green film Winter 2021	19			113	Green film Summer 2021	21
								49	Clean start Summer 2020	39			96	Green film Winter 2021	26			113	Green film Summer 2021	28
							12	51	Clean start Summer 2020	39		14	97	Green film Winter 2021	38			113	Green film Summer 2021	48
								51	Clean start Summer 2020	39			97	Green film Winter 2021	38			113	Green film Summer 2021	36
								51	Clean start Summer 2020	39			97	Green film Winter 2021	38			113	Green film Summer 2021	36
								51	Clean start Summer 2020	39			97	Green film Winter 2021	38			113	Green film Summer 2021	42
								51	Clean start Summer 2020	39			97	Green film Winter 2021	38			113	Green film Summer 2021	32
								51	Clean start Summer 2020	39			97	Green film Winter 2021	45			113	Green film Summer 2021	32
							13	51	Clean start Summer 2020	39			97	Green film Winter 2021	45			113	Green film Summer 2021	32
							14	52	Clean start Summer 2020	38			97	Green film Winter 2021	33			113	Green film Summer 2021	32
								52	Clean start Summer 2020	38			97	Green film Winter 2021	20			113	Green film Summer 2021	32
								52	Clean start Summer 2020	38			97	Green film Winter 2021	20			113	Green film Summer 2021	40
								52	Clean start Summer 2020	38			97	Green film Winter 2021	26			113	Green film Summer 2021	40
								52	Clean start Summer 2020	38			97	Green film Winter 2021	26			113	Green film Summer 2021	40
								52	Clean start Summer 2020	38			97	Green film Winter 2021	33			113	Green film Summer 2021	40
							15	54	Clean start Summer 2020	32		15	98	Green film Winter 2021	31		11	114	Green film Summer 2021	36
								54	Clean start Summer 2020	32			98	Green film Winter 2021	38			114	Green film Summer 2021	33
								54	Clean start Summer 2020	32			98	Green film Winter 2021	38			114	Green film Summer 2021	33
								54	Clean start Summer 2020	32			98	Green film Winter 2021	38			114	Green film Summer 2021	40
								54	Clean start Summer 2020	32			98	Green film Winter 2021	38			114	Green film Summer 2021	33
								54	Clean start Summer 2020	32			98	Green film Winter 2021	24			114	Green film Summer 2021	33
							16	56	Clean start Summer 2020	39			98	Green film Winter 2021	31			114	Green film Summer 2021	33
								56	Clean start Summer 2020	39			98	Green film Winter 2021	31			114	Green film Summer 2021	40
								56	Clean start Summer 2020	39			98	Green film Winter 2021	26			114	Green film Summer 2021	40
								56	Clean start Summer 2020	39			98	Green film Winter 2021	26			114	Green film Summer 2021	40
								56	Clean start Summer 2020	39			98	Green film Winter 2021	26			114	Green film Summer 2021	40
								56	Clean start Summer 2020	39			98	Green film Winter 2021	19			114	Green film Summer 2021	40
								56	Clean start Summer 2020	39			98	Green film Winter 2021	26			114	Green film Summer 2021	40
								56	Clean start Summer 2020	39			98	Green film Winter 2021	19			114	Green film Summer 2021	40
								56	Clean start Summer 2020	39			98	Green film Winter 2021	26			114	Green film Summer 2021	40
								56	Clean start Summer 2020	39			98	Green film Winter 2021	26			114	Green film Summer 2021	47
								56	Clean start Summer 2020	39		16	99	Green film Winter 2021	26			114	Green film Summer 2021	47
								56	Clean start Summer 2020	45			99	Green film Winter 2021	33			114	Green film Summer 2021	47
								56	Clean start Summer 2020	45			99	Green film Winter 2021	20			114	Green film Summer 2021	47
							17	59	Clean start Summer 2020	38			99	Green film Winter 2021	20		12	115	Green film Summer 2021	21
								59	Clean start Summer 2020	38			99	Green film Winter 2021	20			115	Green film Summer 2021	28
								59	Clean start Summer 2020	38			99	Green film Winter 2021	20			115	Green film Summer 2021	34
								59	Clean start Summer 2020	38			99	Green film Winter 2021	26			115	Green film Summer 2021	21
								59	Clean start Summer 2020	38			99	Green film Winter 2021	26			115	Green film Summer 2021	21
								59	Clean start Summer 2020	38			99	Green film Winter 2021	33			115	Green film Summer 2021	21
								59	Clean start Summer 2020	38			99	Green film Winter 2021	33			115	Green film Summer 2021	21
							18	61	Clean start Summer 2020	39			99	Green film Winter 2021	33			115	Green film Summer 2021	28
								61	Clean start Summer 2020	39			99	Green film Winter 2021	33			115	Green film Summer 2021	28
								61	Clean start Summer 2020	39			99	Green film Winter 2021	33			115	Green film Summer 2021	28
								61	Clean start Summer 2020	39		17	101	Green film Winter 2021	24			115	Green film Summer 2021	34
							19	62	Clean start Summer 2020	39			101	Green film Winter 2021	24			115	Green film Summer 2021	34
								62	Clean start Summer 2020	39			101	Green film Winter 2021	24			115	Green film Summer 2021	42
								62	Clean start Summer 2020	39		18	102	Green film Winter 2021	31			115	Green film Summer 2021	21
								62	Clean start Summer 2020	39			102	Green film Winter 2021	31			115	Green film Summer 2021	42
								62	Clean start Summer 2020	39			102	Green film Winter 2021	31			115	Green film Summer 2021	42
								62	Clean start Summer 2020	39			102	Green film Winter 2021	31			115	Green film Summer 2021	42
								62	Clean start Summer 2020	46		19	103	Green film Winter 2021	26		13	116	Green film Summer 2021	28
								62	Clean start Summer 2020	46			103	Green film Winter 2021	33			116	Green film Summer 2021	28
								62	Clean start Summer 2020	46			103	Green film Winter 2021	26			116	Green film Summer 2021	33
								62	Clean start Summer 2020	46			103	Green film Winter 2021	26			116	Green film Summer 2021	33
							20	63	Clean start Summer 2020	40			103	Green film Winter 2021	26			116	Green film Summer 2021	33
								63	Clean start Summer 2020	40			103	Green film Winter 2021	26			116	Green film Summer 2021	40
								63	Green film Summer 2020	31			103	Green film Winter 2021	26		14	118	Green film Summer 2021	33
								63	Green film Summer 2020	31			103	Green film Winter 2021	33			118	Green film Summer 2021	33
								63	Green film Summer 2020	31			103	Green film Winter 2021	33			118	Green film Summer 2021	33
								63	Green film Summer 2020	45			103	Green film Winter 2021	33			118	Green film Summer 2021	27
								63	Green film Summer 2020	31			103	Green film Winter 2021	33			118	Green film Summer 2021	33
								63	Green film Summer 2020	45			103	Green film Winter 2021	33			118	Green film Summer 2021	33
							21	64	Green film Summer 2020	46			103	Green film Winter 2021	33			118	Green film Summer 2021	33
								64	Green film Summer 2020	46			103	Green film Winter 2021	33		15	119	Green film Summer 2021	25
								64	Green film Summer 2020	46		19	104	Green film Winter 2021	26			119	Green film Summer 2021	32
							22	71	Green film Summer 2020	31			104	Green film Winter 2021	26			119	Green film Summer 2021	32
								71	Green film Summer 2020	31			104	Green film Winter 2021	26			119	Green film Summer 2021	32
								71	Green film Summer 2020	31			104	Green film Winter 2021	26			119	Green film Summer 2021	32
								71	Green film Summer 2020	31			104	Green film Winter 2021	26			119	Green film Summer 2021	25
								71	Green film Summer 2020	32			104	Green film Winter 2021	26			119	Green film Summer 2021	25
								71	Green film Summer 2020	32			104	Green film Winter 2021	33			119	Green film Summer 2021	25
							23	75	Green film Summer 2020	52			104	Green film Winter 2021	33			119	Green film Summer 2021	32
								75	Green film Summer 2020	52			104	Green film Winter 2021	33			119	Green film Summer 2021	32
							24	76	Green film Summer 2020	45			104	Green film Winter 2021	33			119	Green film Summer 2021	32
								76	Green film Summer 2020	45		20	105	Green film Winter 2021	33			119	Green film Summer 2021	32
								76	Green film Summer 2020	45			105	Green film Winter 2021	33			119	Green film Summer 2021	32
								76	Green film Summer 2020	41			105	Green film Winter 2021	33			119	Green film Summer 2021	32
								76	Green film Summer 2020	41		21	40 CP	Green film Winter 2020	17			119	Green film Summer 2021	33
								76	Green film Summer 2020	41			40 CP	Green film Winter 2020	17			119	Green film Summer 2021	33
								76	Green film Summer 2020	41			40 CP	Green film Winter 2020	17			119	Green film Summer 2021	27
								76	Green film Summer 2020	47			40 CP	Green film Winter 2020	24			119	Green film Summer 2021	27
								76	Green film Summer 2020	47			40 CP	Green film Winter 2020	24			119	Green film Summer 2021	27
								76	Green film Summer 2020	33			40 CP	Green film Winter 2020	24			119	Green film Summer 2021	27
								76	Green film Summer 2020	33			40 CP	Green film Winter 2020	24			119	Green film Summer 2021	33
												22	45 CP	Green film Winter 2020	28			119	Green film Summer 2021	33
									Mean	40.5597			45 CP	Green film Winter 2020	28			119	Green film Summer 2021	33
									Count of Fragments	134			45 CP	Green film Winter 2020	34			119	Green film Summer 2021	33
									Genotypes	24			45 CP	Green film Winter 2020	34			119	Green film Summer 2021	27
													45 CP	Green film Winter 2020	34			119	Green film Summer 2021	27
																	16	120	Green film Summer 2021	31
														Mean	28.2734			120	Green film Summer 2021	31
														Count of Fragments	139			120	Green film Summer 2021	31
														Genotypes	22		17	127	Green film Summer 2021	29
																		127	Green film Summer 2021	29
																		127	Green film Summer 2021	35
																		127	Green film Summer 2021	29
																		127	Green film Summer 2021	29
																		127	Green film Summer 2021	29
																		127	Green film Summer 2021	35
																		127	Green film Summer 2021	35
																	18	129	Green film Summer 2021	33
																		129	Green film Summer 2021	33
																		129	Green film Summer 2021	33
																		129	Green film Summer 2021	33
																		129	Green film Summer 2021	33
																		129	Green film Summer 2021	33
																		129	Green film Summer 2021	33
																	19	131	Green film Summer 2021	32
																		131	Green film Summer 2021	32
																		131	Green film Summer 2021	32
																		131	Green film Summer 2021	32
																		131	Green film Summer 2021	32
																		131	Green film Summer 2021	32
																		131	Green film Summer 2021	32
																		131	Green film Summer 2021	32
																	20	132	Green film Summer 2021	32
																		132	Green film Summer 2021	32
																		132	Green film Summer 2021	32
																			Mean	34.2976
																			Count of Fragments	168
																			Genotypes	20

## Sheet: Figure 3a Data
													Assessment of Tank Fouling Scores Versus Culture Methods
															(Total Tank Score = CCA Health + CCA Recruitment+ Nuisanxe Algae Coverage)
															CCA Health	CCA Recruitment	Nuisance Algae Coverage
															4) Healthy & good CCA growth 3) CCA not dying 2) CCA is dying in small sections ( area < business card) 1) CCA is dying in large sections (area > business card) (max score=4)	4) Lower peysonellids/ CCA 3) No change peysonellids/ CCA 2) Increasing peysonellids/ CCA 1) No Recruitment (max score=4)	5) Light diatoms, green film algae, or Nothing 4) Substantial diatoms and green film algae 3) Film/Diatoms + Light hair algae and/or cyano 2) Film/Diatoms + Medium Hair algae and/or cyano 1) Film/Diatoms + heavy hair algae and/or cyano (max score=5)
				Husbandry Method: Clean Start							Husbandry Method: Green Film - Summer								Husbandry Method: Green Film - Winter
		Unique Genotypes	Microfragments Harvested Within the Genotype During Tank Assessment	Date	Total Tank Metric Fouling Score					Unique Genotypes	Microfragments Harvested Within the Genotype During Tank Assessment	Date	Total Tank Metric Fouling Score				Unique Genotypes	Microfragments Harvested Within the Genotype During Tank Assessment	Date	Total Tank Metric Fouling Score
		31	31	2020-05-20	10					71	71	2020-09-11	13				86	86	2020-12-04	10
			31	2020-05-20	10						71	2020-09-11	13					87	2020-12-11	7
			31	2020-05-20	10						71	2020-09-11	13					87	2020-12-11	7
			33	2020-05-20	11						71	2020-09-11	13					87	2020-12-11	7
			33	2020-05-20	11						71	2020-09-11	13					40 CP	2020-12-18	7
			33	2020-05-20	11						71	2020-09-11	13				40CP	40 CP	2020-12-18	7
			33	2020-05-20	10					79	79	2020-09-11	5					40 CP	2020-12-18	7
			33	2020-05-20	10					64	64	2020-09-18	13					40 CP	2020-12-18	7
			33	2020-05-20	10						64	2020-09-18	13					40 CP	2020-12-18	10
			33	2020-05-20	11						64	2020-09-18	9					40 CP	2020-12-18	10
			33	2020-05-20	11						64	2020-09-18	9					40-CP	2020-12-18	10
			33	2020-05-20	11						64	2020-09-18	8					40-CP	2020-12-18	10
			33	2020-06-11	13						64	2020-09-18	8					40-CP	2020-12-18	10
			33	2020-06-11	13						64	2020-09-18	8				45 CP	45 CP	2020-12-22	10
			33	2020-06-11	13					75	75	2020-09-18	9					45 CP	2020-12-22	10
			33	2020-06-11	11						75	2020-09-18	9					45 CP	2020-12-22	7
			36	2020-06-11	11					76	76	2020-09-23	9					45 CP	2020-12-22	7
			36	2020-06-11	13						76	2020-09-23	9					45 CP	2020-12-22	7
			36	2020-06-11	13						76	2020-09-23	8				88	88	2021-01-06	13
			36	2020-06-11	13						76	2020-09-23	8					88	2021-01-06	13
		35	35	2020-06-11	11						76	2020-09-23	8					88	2021-01-08	13
			35	2020-06-11	11						76	2020-09-23	8					88	2021-01-08	13
			35	2020-06-11	11						76	2020-09-23	8					88	2021-01-08	13
			35	2020-06-11	6						76	2020-09-23	8					88	2021-01-08	13
			35	2020-06-11	6					79	79	2020-09-24	13					88	2021-01-08	13
			35	2020-06-11	6						79	2020-09-24	13					88	2021-01-08	13
		36	36	2020-06-11	6						79	2020-09-24	13					88	2021-01-08	13
			36	2020-06-11	6						79	2020-09-24	9				89	89	2021-01-09	13
			36	2020-06-11	6						79	2020-09-24	9					89	2021-01-09	13
			36	2020-06-11	6						79	2020-09-24	9				90	90	2021-01-13	13
			36	2020-06-11	6						79	2020-09-24	9					90	2021-01-13	13
			36	2020-06-11	6						79	2020-09-24	9					90	2021-01-13	13
		43	43	2020-06-11	6						79	2020-09-24	9				92	92	2021-01-15	13
			43	2020-06-11	6						79	2020-09-24	9					92	2021-01-15	13
			43	2020-06-11	6						79	2020-09-24	9					92	2021-01-15	13
			43	2020-06-11	6						79	2020-09-24	8				93	93	2021-01-20	13
			43	2020-06-11	6						79	2020-09-24	8					93	2021-01-20	13
		44	44	2020-06-11	6						79	2020-09-24	8					93	2021-01-20	13
			44	2020-06-11	6						79	2020-09-24	8					93	2021-01-20	13
			44	2020-06-11	6						79	2020-09-24	8					93	2021-01-20	13
			44	2020-06-11	6						79	2020-09-24	8				94	94	2021-01-20	13
			44	2020-06-18	6					80	80	2020-09-30	8					94	2021-01-20	13
			44	2020-06-18	6						80	2020-09-30	8					94	2021-01-20	13
			44	2020-06-18	6						80	2020-09-30	8					94	2021-01-20	13
			44	2020-06-18	6						80	2020-09-30	8					94	2021-01-20	13
			44	2020-06-18	6						80	2020-09-30	8				95	95	2021-01-25	13
			44	2020-06-18	6						80	2020-09-30	8				97	97	2021-01-27	13
			44	2020-06-18	6						80	2020-09-30	8					97	2021-01-27	13
			44	2020-06-18	6					81	81	2020-09-30	8					97	2021-01-27	13
			44	2020-06-18	6						81	2020-09-30	8					97	2021-01-27	13
			44	2020-06-18	6						81	2020-09-30	8					97	2021-01-27	13
			44	2020-06-18	6						81	2020-09-30	8					97	2021-01-27	13
			44	2020-06-18	6						81	2020-09-30	8				98	99	2021-01-27	13
			44	2020-06-18	6						81	2020-09-30	8					99	2021-01-27	13
			44	2020-06-18	6						81	2020-09-30	8					99	2021-01-27	13
			44	2020-06-18	6						81	2020-09-30	8					99	2021-01-27	13
			44	2020-06-25	13						79	2020-10-01	8					99	2021-01-27	13
			44	2020-06-25	13						79	2020-10-01	8					99	2021-01-27	13
			44	2020-06-25	13						79	2020-10-01	8					99	2021-01-27	13
			44	2020-06-25	13						79	2020-10-01	8					99	2021-01-27	13
			44	2020-06-25	13					82	82	2020-10-01	8					99	2021-01-27	13
		46	46	2020-06-25	13						82	2020-10-01	8					99	2021-01-27	13
			46	2020-06-25	9						82	2020-10-01	8					99	2021-01-27	13
			46	2020-06-25	9						82	2020-10-01	8					99	2021-01-27	13
			46	2020-06-25	9						82	2020-10-01	8					99	2021-01-27	13
			46	2020-06-25	9						82	2020-10-01	8				96	96	2021-02-05	12
			46	2020-07-02	9						82	2020-10-01	8					96	2021-02-05	12
			46	2020-07-02	9						80	2020-10-07	8					96	2021-02-05	12
			46	2020-07-02	9						80	2020-10-07	8				98	98	2021-02-05	13
			46	2020-07-02	9						80	2020-10-07	8					98	2021-02-05	12
			46	2020-07-09	10						80	2020-10-07	8					98	2021-02-05	12
			46	2020-07-09	10						80	2020-10-07	8					98	2021-02-05	12
			46	2020-07-09	10					76	76	2020-10-23	8				91	91	2021-02-10	12
			46	2020-07-09	10						76	2020-10-23	8					91	2021-02-10	12
			46	2020-07-09	10						76	2020-10-23	8					91	2021-02-10	12
			46	2020-07-09	10					63	63	2020-11-06	8					98	2021-02-10	12
		47	47	2020-07-09	10						63	2020-11-06	8					98	2021-02-10	12
			47	2020-07-09	10						63	2020-11-06	8					98	2021-02-10	12
			47	2020-07-09	10						63	2020-11-06	8				101	101	2021-03-05	13
			47	2020-07-17	7					107	107	2021-04-01	9					101	2021-03-05	13
			47	2020-07-17	7						107	2021-04-01	9					101	2021-03-05	13
			47	2020-07-17	7					108	108	2021-04-01	9					101	2021-03-05	13
			47	2020-07-17	7						108	2021-04-01	9				102	102	2021-03-05	13
			47	2020-07-17	7						108	2021-04-01	9					102	2021-03-05	13
			47	2020-07-17	7						108	2021-04-01	9					102	2021-03-05	13
			47	2020-07-23	7					109	109	2021-04-07	9					102	2021-03-05	13
		49	49	2020-07-23	7					110	110	2021-04-07	9					96	2021-03-10	13
			49	2020-07-23	7						110	2021-04-07	9					96	2021-03-10	13
			49	2020-07-23	7						110	2021-04-07	9					96	2021-03-10	13
			49	2020-07-23	7						110	2021-04-07	9					98	2021-03-10	13
		51	51	2020-07-23	7						110	2021-04-07	9					98	2021-03-10	13
			51	2020-07-31	12					113	113	2021-04-14	13					98	2021-03-10	13
			51	2020-07-31	12					112	112	2021-04-26	13					98	2021-03-10	13
			51	2020-07-31	12						112	2021-04-26	13					98	2021-03-10	13
			51	2020-07-31	12						113	2021-04-26	13				103	103	2021-03-17	12
			51	2020-07-31	12						113	2021-04-26	13					103	2021-03-17	12
			51	2020-07-31	12						113	2021-04-26	13					103	2021-03-17	12
			51	2020-07-31	12						113	2021-04-26	13					103	2021-03-17	12
			51	2020-07-31	12						113	2021-04-26	13					103	2021-03-17	12
		52	52	2020-07-31	12						113	2021-04-26	13					103	2021-03-17	12
			52	2020-07-31	12					114	114	2021-04-26	5					103	2021-03-17	12
			52	2020-07-31	12					115	115	2021-04-26	13					103	2021-03-17	12
			52	2020-07-31	7						115	2021-04-26	13					103	2021-03-17	12
			52	2020-07-31	7						115	2021-04-26	13					103	2021-03-17	12
			52	2020-07-31	7						115	2021-04-26	13					103	2021-03-17	12
		54	54	2020-08-07	11						115	2021-04-26	13					103	2021-03-17	12
			54	2020-08-07	11						115	2021-04-26	13					103	2021-03-17	12
			54	2020-08-07	11						115	2021-04-26	13					103	2021-03-17	12
			54	2020-08-07	7						115	2021-04-26	13				104	104	2021-03-17	12
			54	2020-08-07	7						115	2021-04-26	13					104	2021-03-17	12
			54	2020-08-07	7						112	2021-04-28	13					104	2021-03-17	12
		56	56	2020-08-07	7						112	2021-04-28	13					104	2021-03-17	12
			56	2020-08-07	11						112	2021-04-28	13					104	2021-03-17	12
			56	2020-08-07	11						115	2021-04-28	13					104	2021-03-17	12
			56	2020-08-07	11						115	2021-04-28	13					104	2021-03-17	12
			56	2020-08-07	11						115	2021-04-28	13					104	2021-03-17	12
			56	2020-08-07	11						112	2021-05-03	6					104	2021-03-17	12
			56	2020-08-07	11						112	2021-05-03	8					104	2021-03-17	12
			56	2020-08-07	11						115	2021-05-03	10				105	105	2021-03-24	9
			56	2020-08-07	11						115	2021-05-03	8					105	2021-03-24	9
			56	2020-08-07	11						115	2021-05-03	8					105	2021-03-24	9
			56	2020-08-07	7						115	2021-05-03	8
		59	59	2020-08-07	7						115	2021-05-03	8
			59	2020-08-07	7						114	2021-05-05	6
			59	2020-08-07	7						114	2021-05-05	6
			59	2020-08-20	7						114	2021-05-05	6
			59	2020-08-20	7						114	2021-05-05	6
			59	2020-08-20	7						114	2021-05-05	6
			59	2020-08-20	7						114	2021-05-05	8
			59	2020-08-20	7						114	2021-05-05	8
			59	2020-08-20	7						114	2021-05-05	8						Mean	11.9091
			59	2020-08-20	7						114	2021-05-05	8						Count	121
			59	2020-08-20	7						114	2021-05-05	8						STDEV	1.76068
			59	2020-08-20	7						114	2021-05-05	8						SEM	0.160062
			59	2020-08-20	7						114	2021-05-05	8
			59	2020-08-20	7						114	2021-05-05	8
			59	2020-08-20	7						114	2021-05-05	8
			59	2020-08-20	7						114	2021-05-05	5
			59	2020-08-20	7						114	2021-05-05	5
			59	2020-08-26	7						114	2021-05-05	5
			59	2020-08-26	7						114	2021-05-05	5
			59	2020-08-26	7						114	2021-05-05	5
			59	2020-04-01	10						114	2021-05-05	5
			59	2020-04-01	10					116	116	2021-05-05	6
			59	2020-04-01	10						116	2021-05-05	6
		61	61	2020-04-01	10						116	2021-05-05	6
			61	2020-04-01	10						116	2021-05-05	8
			61	2020-04-01	10						113	2021-05-27	13
			61	2020-04-01	8						113	2021-05-27	13
		62	62	2020-04-01	8						113	2021-05-27	13
			62	2020-04-01	8						113	2021-05-27	13
			62	2020-04-01	8						113	2021-05-27	13
			62	2020-04-01	8						113	2021-05-27	13
			62	2020-04-01	8						113	2021-05-27	13
			62	2020-04-01	8						113	2021-05-27	13
			62	2020-04-01	8						113	2021-05-27	13
			62	2020-04-01	8						113	2021-05-27	13
			62	2020-04-01	8						113	2021-05-27	13
			62	2020-04-29	9					118	118	2021-06-09	13
		63	63	2020-04-29	9						118	2021-06-09	13
			63	2020-04-29	9						118	2021-06-09	13
			63	2020-04-29	9						118	2021-06-09	13
											118	2021-06-09	13
					8.74691						118	2021-06-09	13
					162						118	2021-06-09	13
					2.31203						118	2021-06-09	13
					0.18165					119	119	2021-06-09	13
											119	2021-06-09	13
											119	2021-06-09	13
											119	2021-06-09	13
											119	2021-06-09	13
											119	2021-06-09	13
											119	2021-06-09	13
											119	2021-06-09	13
											119	2021-06-09	13
											119	2021-06-09	13
										120	120	2021-06-18	12
											120	2021-06-18	12
											120	2021-06-18	12
											119	2021-06-22	12
											119	2021-06-22	12
											119	2021-07-08	12
											119	2021-07-08	12
											119	2021-07-08	12
											119	2021-07-08	12
											119	2021-07-08	12
											119	2021-07-08	12
											119	2021-07-08	12
											119	2021-07-08	12
											119	2021-07-08	12
											119	2021-07-08	12
											119	2021-07-08	12
											119	2021-07-08	12
											119	2021-07-08	12
											119	2021-07-08	12
											116	2021-07-12	12
											116	2021-07-12	12
										123	123	2021-07-21	6
											123	2021-07-21	6
											123	2021-07-21	6
											123	2021-07-21	6
											123	2021-07-21	6
										125	125	2021-07-21	6
											125	2021-07-21	6
											125	2021-07-21	6
											125	2021-07-21	6
											125	2021-07-21	6
											125	2021-07-21	6
											116	2021-07-26	6
											114	2021-08-02	6
											114	2021-08-02	6
											118	2021-08-02	6
											118	2021-08-02	6
											118	2021-08-02	6
										127	127	2021-08-09	10
											127	2021-08-09	10
											127	2021-08-09	10
											127	2021-08-09	10
											127	2021-08-09	10
											127	2021-08-09	10
											127	2021-08-09	10
											127	2021-08-09	10
										129	129	2021-08-11	10
											129	2021-08-11	10
											129	2021-08-11	10
											129	2021-08-11	10
											129	2021-08-11	10
											129	2021-08-11	10
											129	2021-08-11	10
											129	2021-08-11	10
											129	2021-08-11	10
										131	131	2021-08-12	10
											131	2021-08-12	10
											131	2021-08-12	10
											131	2021-08-12	10
											131	2021-08-12	10
											131	2021-08-12	10
											131	2021-08-12	10
											131	2021-08-12	10
										132	132	2021-08-12	10
											132	2021-08-12	10
											132	2021-08-12	10
													9.70248
											Mean		242
											Count		2.53816
											STDEV		0.163159
											SEM

## Sheet: Figure 3b Data
										Assessment of Plate Fouling Scores Versus Culture Methods
											(Total Tank Score = CCA Health + CCA Recruitment+ Nuisanxe Algae Coverage)
									CCA Health	CCA Recruitment	Nuisance Algae Coverage
									4) Healthy & good CCA growth 3) CCA not dying 2) CCA is dying in small sections ( area < business card) 1) CCA is dying in large sections (area > business card) (max score=4)	4) Lower peysonellids/ CCA 3) No change peysonellids/ CCA 2) Increasing peysonellids/ CCA 1) No Recruitment (max score=4)	5) Light diatoms, green film algae, or Nothing 4) Substantial diatoms and green film algae 3) Film/Diatoms + Light hair algae and/or cyano 2) Film/Diatoms + Medium Hair algae and/or cyano 1) Film/Diatoms + heavy hair algae and/or cyano (max score=5)
											Husbandry Method: Green Film - Summer					Husbandry Method: Green Film - Winter
				Husbandry Method: Clean Start
				Unique Genotypes	Microfragments Harvested Within the Genotype During Tank Assessment	Date	Total Plate Metric Fouling Score			Unique Genotypes	Microfragments Harvested Within the Genotype During Tank Assessment	Date	Total Plate Metric Fouling Score		Unique Genotypes	Microfragments Harvested Within the Genotype During Tank Assessment	Date	Total Plate Metric Fouling Score
				31	31	2020-04-01	11			71	71	2020-09-11	11		86	86	2020-12-04	7
					31	2020-04-01	11				71	2020-09-11	11		87	87	2020-12-11	10
					31	2020-04-01	11				71	2020-09-11	11			87	2020-12-11	10
				33	33	2020-04-01	11				71	2020-09-11	11			87	2020-12-11	10
					33	2020-04-01	11				71	2020-09-11	11		40 CP	40 CP	2020-12-18	8
					33	2020-04-01	11				71	2020-09-11	11			40 CP	2020-12-18	8
					33	2020-04-01	5			79	79	2020-09-11	5			40 CP	2020-12-18	8
					33	2020-04-01	5			1900-03-04	64	2020-09-18	9			40 CP	2020-12-18	8
					33	2020-04-01	5				64	2020-09-18	9			40 CP	2020-12-18	8
					33	2020-04-01	5				64	2020-09-18	7			40 CP	2020-12-18	8
					33	2020-04-01	5				64	2020-09-18	7			40-CP	2020-12-18	9
					33	2020-04-01	5				64	2020-09-18	6			40-CP	2020-12-18	9
					33	2020-04-01	5				64	2020-09-18	6			40-CP	2020-12-18	9
					33	2020-04-01	5				64	2020-09-18	6		45 CP	45 CP	2020-12-22	8
					33	2020-04-01	8			75	75	2020-09-18	7			45 CP	2020-12-22	8
					33	2020-04-01	8				75	2020-09-18	7			45 CP	2020-12-22	7
				36	36	2020-04-29	8			76	76	2020-09-23	9			45 CP	2020-12-22	7
					36	2020-04-29	8				76	2020-09-23	9			45 CP	2020-12-22	7
					36	2020-04-29	8				76	2020-09-23	9		88	88	2021-01-06	9
					36	2020-04-29	8				76	2020-09-23	9			88	2021-01-06	9
				35	35	2020-05-20	11				76	2020-09-23	9			88	2021-01-08	10
					35	2020-05-20	11				76	2020-09-23	9			88	2021-01-08	10
					35	2020-05-20	11				76	2020-09-23	8			88	2021-01-08	10
					35	2020-05-20	11				76	2020-09-23	8			88	2021-01-08	10
					35	2020-05-20	11			79	79	2020-09-24	10			88	2021-01-08	10
					35	2020-05-20	11				79	2020-09-24	10			88	2021-01-08	10
					36	2020-05-20	8				79	2020-09-24	10			88	2021-01-08	10
					36	2020-05-20	8				79	2020-09-24	7		89	89	2021-01-09	10
					36	2020-05-20	8				79	2020-09-24	7			89	2021-01-09	10
					36	2020-05-20	8				79	2020-09-24	7		90	90	2021-01-13	10
					36	2020-05-20	8				79	2020-09-24	7			90	2021-01-13	10
					36	2020-05-20	8				79	2020-09-24	7			90	2021-01-13	10
				43	43	2020-06-11	13				79	2020-09-24	7		92	92	2021-01-15	11
					43	2020-06-11	13				79	2020-09-24	7			92	2021-01-15	11
					43	2020-06-11	13				79	2020-09-24	7			92	2021-01-15	11
					43	2020-06-11	13				79	2020-09-24	6		93	93	2021-01-20	12
					43	2020-06-11	13				79	2020-09-24	6			93	2021-01-20	12
				44	44	2020-06-11	12				79	2020-09-24	6			93	2021-01-20	12
					44	2020-06-11	12				79	2020-09-24	6			93	2021-01-20	12
					44	2020-06-11	12				79	2020-09-24	6			93	2021-01-20	12
					44	2020-06-11	12				79	2020-09-24	6		94	94	2021-01-20	12
					44	2020-06-11	12			80	80	2020-09-30	8			94	2021-01-20	12
					44	2020-06-11	12				80	2020-09-30	8			94	2021-01-20	12
					44	2020-06-11	7				80	2020-09-30	8			94	2021-01-20	12
					44	2020-06-11	7				80	2020-09-30	8			94	2021-01-20	10
					44	2020-06-11	7				80	2020-09-30	8		95	95	2021-01-25	9
					44	2020-06-11	7				80	2020-09-30	8		97	97	2021-01-27	12
					44	2020-06-11	7				80	2020-09-30	8			97	2021-01-27	12
					44	2020-06-11	7			81	81	2020-09-30	7			97	2021-01-27	12
					44	2020-06-11	7				81	2020-09-30	7			97	2021-01-27	12
					44	2020-06-11	7				81	2020-09-30	7			97	2021-01-27	10
					44	2020-06-11	7				81	2020-09-30	7			97	2021-01-27	10
					44	2020-06-11	7				81	2020-09-30	7		99	99	2021-01-27	12
					44	2020-06-11	7				81	2020-09-30	7			99	2021-01-27	12
					44	2020-06-11	7				81	2020-09-30	7			99	2021-01-27	12
					44	2020-06-11	7				81	2020-09-30	7			99	2021-01-27	12
					44	2020-06-11	7				79	2020-10-01	8			99	2021-01-27	12
					44	2020-06-11	7				79	2020-10-01	8			99	2021-01-27	12
					44	2020-06-11	7				79	2020-10-01	8			99	2021-01-27	12
					44	2020-06-11	7				79	2020-10-01	8			99	2021-01-27	10
					44	2020-06-11	7			82	82	2020-10-01	8			99	2021-01-27	10
				46	46	2020-06-18	6				82	2020-10-01	8			99	2021-01-27	10
					46	2020-06-18	6				82	2020-10-01	8			99	2021-01-27	10
					46	2020-06-18	6				82	2020-10-01	8			99	2021-01-27	10
					46	2020-06-18	6				82	2020-10-01	8			99	2021-01-27	10
					46	2020-06-18	6				82	2020-10-01	8		96	96	2021-02-05	13
					46	2020-06-18	6				82	2020-10-01	8			96	2021-02-05	13
					46	2020-06-18	6				80	2020-10-07	7			96	2021-02-05	13
					46	2020-06-18	6				80	2020-10-07	7		98	98	2021-02-05	13
					46	2020-06-18	6				80	2020-10-07	7			98	2021-02-05	13
					46	2020-06-18	6				80	2020-10-07	7			98	2021-02-05	13
					46	2020-06-18	6				80	2020-10-07	7			98	2021-02-05	13
					46	2020-06-18	6				76	2020-10-23	7		91	91	2021-02-10	13
					46	2020-06-18	5				76	2020-10-23	7			91	2021-02-10	13
					46	2020-06-18	5				76	2020-10-23	7			91	2021-02-10	13
					46	2020-06-18	5				63	2020-11-06	7			98	2021-02-10	12
				47	47	2020-06-25	10			63	63	2020-11-06	7			98	2021-02-10	12
					47	2020-06-25	10				63	2020-11-06	7			98	2021-02-10	12
					47	2020-06-25	10				63	2020-11-06	7		101	101	2021-03-05	11
					47	2020-06-25	10			107	107	2021-04-01	10			101	2021-03-05	11
					47	2020-06-25	10				107	2021-04-01	10			101	2021-03-05	11
					47	2020-06-25	10			108	108	2021-04-01	11			101	2021-03-05	11
					47	2020-06-25	10				108	2021-04-01	12		102	102	2021-03-05	11
					47	2020-06-25	10				108	2021-04-01	13			102	2021-03-05	11
					47	2020-06-25	10				108	2021-04-01	10			102	2021-03-05	11
					47	2020-06-25	10			109	109	2021-04-07	8			102	2021-03-05	11
				49	49	2020-07-02	7			110	110	2021-04-07	11			96	2021-03-10	13
					49	2020-07-02	7				110	2021-04-07	11			96	2021-03-10	13
					49	2020-07-02	7				110	2021-04-07	11			96	2021-03-10	13
					49	2020-07-02	7				110	2021-04-07	9			98	2021-03-10	13
				51	51	2020-07-09	7				110	2021-04-07	12			98	2021-03-10	13
					51	2020-07-09	7			113	113	2021-04-14	11			98	2021-03-10	13
					51	2020-07-09	7			112	112	2021-04-26	12			98	2021-03-10	13
					51	2020-07-09	7				112	2021-04-26	12			98	2021-03-10	13
					51	2020-07-09	7				113	2021-04-26	13		103	103	2021-03-17	13
					51	2020-07-09	7				113	2021-04-26	13			103	2021-03-17	13
					51	2020-07-09	7				113	2021-04-26	11			103	2021-03-17	13
					51	2020-07-09	7				113	2021-04-26	11			103	2021-03-17	13
					51	2020-07-09	7				113	2021-04-26	13			103	2021-03-17	13
				52	52	2020-07-17	7				113	2021-04-26	13			103	2021-03-17	13
					52	2020-07-17	7			114	114	2021-04-26	5			103	2021-03-17	13
					52	2020-07-17	7			115	115	2021-04-26	9			103	2021-03-17	13
					52	2020-07-17	7				115	2021-04-26	9			103	2021-03-17	13
					52	2020-07-17	7				115	2021-04-26	9			103	2021-03-17	13
					52	2020-07-17	7				115	2021-04-26	9			103	2021-03-17	13
				54	54	2020-07-23	10				115	2021-04-26	9			103	2021-03-17	13
					54	2020-07-23	10				115	2021-04-26	8			103	2021-03-17	13
					54	2020-07-23	10				115	2021-04-26	8			103	2021-03-17	13
					54	2020-07-23	10				115	2021-04-26	8		104	104	2021-03-17	13
					54	2020-07-23	10				115	2021-04-26	8			104	2021-03-17	13
					54	2020-07-23	10				112	2021-04-28	13			104	2021-03-17	13
				56	56	2020-07-31	9				112	2021-04-28	13			104	2021-03-17	13
					56	2020-07-31	9				112	2021-04-28	11			104	2021-03-17	13
					56	2020-07-31	9				115	2021-04-28	13			104	2021-03-17	13
					56	2020-07-31	9				115	2021-04-28	13			104	2021-03-17	13
					56	2020-07-31	9				115	2021-04-28	13			104	2021-03-17	13
					56	2020-07-31	9				112	2021-05-03	11			104	2021-03-17	13
					56	2020-07-31	9				112	2021-05-03	7			104	2021-03-17	13
					56	2020-07-31	9				115	2021-05-03	9		105	105	2021-03-24	8
					56	2020-07-31	9				115	2021-05-03	7			105	2021-03-24	9
					56	2020-07-31	9				115	2021-05-03	7			105	2021-03-24	8
					56	2020-07-31	9				115	2021-05-03	7
				59	59	2020-07-31	9				115	2021-05-03	7
					59	2020-07-31	9				114	2021-05-05	9				Mean	11.1901
					59	2020-07-31	9				114	2021-05-05	9				Count	121
					59	2020-08-07	11				114	2021-05-05	9				STDEV	1.80884
					59	2020-08-07	11				114	2021-05-05	9				SEM	0.16444
					59	2020-08-07	11				114	2021-05-05	9
					59	2020-08-07	8				114	2021-05-05	8
					59	2020-08-07	8				114	2021-05-05	8
					59	2020-08-07	8				114	2021-05-05	8
					59	2020-08-07	8				114	2021-05-05	8
					59	2020-08-07	12				114	2021-05-05	8
					59	2020-08-07	12				114	2021-05-05	8
					59	2020-08-07	12				114	2021-05-05	8
					59	2020-08-07	12				114	2021-05-05	8
					59	2020-08-07	12				114	2021-05-05	8
					59	2020-08-07	12				114	2021-05-05	6
					59	2020-08-07	12				114	2021-05-05	6
					59	2020-08-07	12				114	2021-05-05	6
					59	2020-08-07	12				114	2021-05-05	6
					59	2020-08-07	11				114	2021-05-05	6
					59	2020-08-07	11				114	2021-05-05	6
					59	2020-08-07	11			116	116	2021-05-05	12
					59	2020-08-07	11				116	2021-05-05	12
				61	61	2020-08-20	9				116	2021-05-05	12
					61	2020-08-20	9				116	2021-05-05	7
					61	2020-08-20	9				113	2021-05-27	13
					61	2020-08-20	9				113	2021-05-27	13
				62	62	2020-08-20	9				113	2021-05-27	13
					62	2020-08-20	9				113	2021-05-27	13
					62	2020-08-20	9				113	2021-05-27	13
					62	2020-08-20	9				113	2021-05-27	13
					62	2020-08-20	9				113	2021-05-27	13
					62	2020-08-20	9				113	2021-05-27	11
					62	2020-08-20	7				113	2021-05-27	11
					62	2020-08-20	7				113	2021-05-27	11
					62	2020-08-20	7				113	2021-05-27	11
					62	2020-08-20	7			118	118	2021-06-09	13
				63	63	2020-08-26	8				118	2021-06-09	13
					63	2020-08-26	8				118	2021-06-09	12
					63	2020-08-26	8				118	2021-06-09	12
											118	2021-06-09	12
											118	2021-06-09	12
											118	2021-06-09	12
						Mean	8.61728				118	2021-06-09	12
						Count	162			119	119	2021-06-09	13
						STDEV	2.15872				119	2021-06-09	13
						SEM	0.169605				119	2021-06-09	13
											119	2021-06-09	13
											119	2021-06-09	13
											119	2021-06-09	13
											119	2021-06-09	13
											119	2021-06-09	13
											119	2021-06-09	13
											119	2021-06-09	13
										120	120	2021-06-18	11
											120	2021-06-18	11
											120	2021-06-18	11
											119	2021-06-22	11
											119	2021-06-22	11
											119	2021-07-08	12
											119	2021-07-08	12
											119	2021-07-08	12
											119	2021-07-08	12
											119	2021-07-08	12
											119	2021-07-08	12
											119	2021-07-08	12
											119	2021-07-08	12
											119	2021-07-08	12
											119	2021-07-08	12
											119	2021-07-08	12
											119	2021-07-08	12
											119	2021-07-08	12
											119	2021-07-08	12
											116	2021-07-12	13
											116	2021-07-12	13
										123	123	2021-07-21	10
											123	2021-07-21	10
											123	2021-07-21	10
											123	2021-07-21	10
											123	2021-07-21	10
										125	125	2021-07-21	12
											125	2021-07-21	12
											125	2021-07-21	12
											125	2021-07-21	12
											125	2021-07-21	12
											125	2021-07-21	12
											116	2021-07-26	13
											114	2021-08-02	13
											114	2021-08-02	13
											118	2021-08-02	11
											118	2021-08-02	11
											118	2021-08-02	11
										127	127	2021-08-09	13
											127	2021-08-09	13
											127	2021-08-09	13
											127	2021-08-09	13
											127	2021-08-09	13
											127	2021-08-09	12
											127	2021-08-09	12
											127	2021-08-09	12
										129	129	2021-08-11	13
											129	2021-08-11	13
											129	2021-08-11	13
											129	2021-08-11	13
											129	2021-08-11	13
											129	2021-08-11	13
											129	2021-08-11	13
											129	2021-08-11	13
											129	2021-08-11	13
										131	131	2021-08-12	13
											131	2021-08-12	13
											131	2021-08-12	13
											131	2021-08-12	13
											131	2021-08-12	13
											131	2021-08-12	13
											131	2021-08-12	13
											131	2021-08-12	13
										132	132	2021-08-12	13
											132	2021-08-12	13
											132	2021-08-12	13
												Mean	10.0165
												Count	242
												STDEV	2.48642
												SEM	0.159833
									Mean
									Count
									STDEV
									SEM

## Sheet: Figure 3c Data
										Assessment ofMicrofragment Group Health Scores Versus Culture Methods
											(Total Tank Score = Polyp Extension + Change in Paling + New Tissue)
											Polyp Extension	Change in Paling/ Tissue Recession	New Tissue Integrity
											4) ~100% of frags extended 3) ~75% of frags extended 2) ~50% of frags extended 1) ~25% of frags extended (max score=4)	4)No new paling or recession 3) 1+ corals are 50%+ paled or receded 2)1+ corals are pale or receded 1) 3+ corals are pale or receded (max score=4)	5)Thin and Fast 4)Thick and Fast 3) Extra Thick and Slow Growth 2)Thin and Pale 1) No growth (max score=5)
				Husbandry Method: Clean Start						Husbandry Method: Green Film - Summer					Husbandry Method: Green Film - Winter
			Unique Genotypes	Microfragments Harvested Within the Genotype During Tank Assessment	Date	Total Microfragment Group Helath			Unique Genotypes	Microfragments Harvested Within the Genotype During Tank Assessment	Date	Total Microfragment Group Helath		Unique Genotypes	Microfragments Harvested Within the Genotype During Tank Assessment	Date	Total Microfragment Group Helath
			31	31	2020-04-01	13			71	71	2020-09-11	11		86	86	2020-12-04	12
				31	2020-04-01	13				71	2020-09-11	11		87	87	2020-12-11	12
				31	2020-04-01	13				71	2020-09-11	11			87	2020-12-11	12
				33	2020-04-01	10				71	2020-09-11	11			87	2020-12-11	12
				33	2020-04-01	10				71	2020-09-11	11		40 cp	40 CP	2020-12-18	13
				33	2020-04-01	10				71	2020-09-11	11			40 CP	2020-12-18	13
				33	2020-04-01	11			79	79	2020-09-11	8			40 CP	2020-12-18	13
				33	2020-04-01	11			64	64	2020-09-18	10			40 CP	2020-12-18	13
				33	2020-04-01	11				64	2020-09-18	10			40 CP	2020-12-18	12
				33	2020-04-01	11				64	2020-09-18	6			40 CP	2020-12-18	12
				33	2020-04-01	11				64	2020-09-18	6			40-CP	2020-12-18	13
				33	2020-04-01	11				64	2020-09-18	6			40-CP	2020-12-18	13
				33	2020-04-01	11				64	2020-09-18	6			40-CP	2020-12-18	13
				33	2020-04-01	11				64	2020-09-18	6		45cp	45 CP	2020-12-22	13
				33	2020-04-01	11			75	75	2020-09-18	11			45 CP	2020-12-22	13
				33	2020-04-01	11				75	2020-09-18	11			45 CP	2020-12-22	12
				36	2020-04-29	4			76	76	2020-09-23	13			45 CP	2020-12-22	12
				36	2020-04-29	4				76	2020-09-23	13			45 CP	2020-12-22	12
				36	2020-04-29	4				76	2020-09-23	12		88	88	2021-01-06	12
				36	2020-04-29	4				76	2020-09-23	12			88	2021-01-06	12
			35	35	2020-05-20	13				76	2020-09-23	12			88	2021-01-08	12
				35	2020-05-20	13				76	2020-09-23	12			88	2021-01-08	12
				35	2020-05-20	13				76	2020-09-23	11			88	2021-01-08	12
				35	2020-05-20	13				76	2020-09-23	11			88	2021-01-08	12
				35	2020-05-20	13			79	79	2020-09-24	11			88	2021-01-08	12
				35	2020-05-20	13				79	2020-09-24	11			88	2021-01-08	12
			36	36	2020-05-20	11				79	2020-09-24	11			88	2021-01-08	12
				36	2020-05-20	11				79	2020-09-24	11			89	2021-01-09	12
				36	2020-05-20	11				79	2020-09-24	11			89	2021-01-09	12
				36	2020-05-20	12				79	2020-09-24	11		90	90	2021-01-13	12
				36	2020-05-20	12				79	2020-09-24	11			90	2021-01-13	12
				36	2020-05-20	12				79	2020-09-24	11			90	2021-01-13	12
			43	43	2020-06-11	13				79	2020-09-24	11		92	92	2021-01-15	13
				43	2020-06-11	13				79	2020-09-24	11			92	2021-01-15	13
				43	2020-06-11	13				79	2020-09-24	11			92	2021-01-15	13
				43	2020-06-11	13				79	2020-09-24	10		93	93	2021-01-20	12
				43	2020-06-11	13				79	2020-09-24	10			93	2021-01-20	12
			44	44	2020-06-11	13				79	2020-09-24	10			93	2021-01-20	13
				44	2020-06-11	13				79	2020-09-24	10			93	2021-01-20	13
				44	2020-06-11	13				79	2020-09-24	10			93	2021-01-20	13
				44	2020-06-11	13				79	2020-09-24	10		94	94	2021-01-20	12
				44	2020-06-11	13			80	80	2020-09-30	13			94	2021-01-20	12
				44	2020-06-11	13				80	2020-09-30	13			94	2021-01-20	12
				44	2020-06-11	11				80	2020-09-30	13			94	2021-01-20	12
				44	2020-06-11	11				80	2020-09-30	12			94	2021-01-20	13
				44	2020-06-11	11				80	2020-09-30	12		95	95	2021-01-25	13
				44	2020-06-11	11				80	2020-09-30	12		97	97	2021-01-27	13
				44	2020-06-11	11				80	2020-09-30	12			97	2021-01-27	13
				44	2020-06-11	11			81	81	2020-09-30	11			97	2021-01-27	13
				44	2020-06-11	10				81	2020-09-30	11			97	2021-01-27	13
				44	2020-06-11	10				81	2020-09-30	11			97	2021-01-27	13
				44	2020-06-11	10				81	2020-09-30	11			97	2021-01-27	13
				44	2020-06-11	10				81	2020-09-30	11		99	99	2021-01-27	13
				44	2020-06-11	10				81	2020-09-30	11			99	2021-01-27	13
				44	2020-06-11	10				81	2020-09-30	11			99	2021-01-27	13
				44	2020-06-11	5				81	2020-09-30	11			99	2021-01-27	13
				44	2020-06-11	5				79	2020-10-01	12			99	2021-01-27	13
				44	2020-06-11	5				79	2020-10-01	12			99	2021-01-27	13
				44	2020-06-11	5				79	2020-10-01	12			99	2021-01-27	13
				44	2020-06-11	5				79	2020-10-01	12			99	2021-01-27	13
				44	2020-06-11	5			82	82	2020-10-01	12			99	2021-01-27	13
			46	46	2020-06-18	10				82	2020-10-01	12			99	2021-01-27	13
				46	2020-06-18	10				82	2020-10-01	12			99	2021-01-27	13
				46	2020-06-18	10				82	2020-10-01	12			99	2021-01-27	13
				46	2020-06-18	10				82	2020-10-01	12			99	2021-01-27	13
				46	2020-06-18	10				82	2020-10-01	12		96	96	2021-02-05	13
				46	2020-06-18	10				82	2020-10-01	12			96	2021-02-05	13
				46	2020-06-18	8				80	2020-10-07	11			96	2021-02-05	13
				46	2020-06-18	8				80	2020-10-07	11		98	98	2021-02-05	13
				46	2020-06-18	8				80	2020-10-07	11			98	2021-02-05	12
				46	2020-06-18	8				80	2020-10-07	11			98	2021-02-05	12
				46	2020-06-18	8				80	2020-10-07	11			98	2021-02-05	12
				46	2020-06-18	8				76	2020-10-23	10		91	91	2021-02-10	12
				46	2020-06-18	4				76	2020-10-23	10			91	2021-02-10	12
				46	2020-06-18	4				76	2020-10-23	10			91	2021-02-10	12
				46	2020-06-18	4			63	63	2020-11-06	10			98	2021-02-10	13
			47	47	2020-06-25	13				63	2020-11-06	10			98	2021-02-10	13
				47	2020-06-25	13				63	2020-11-06	10			98	2021-02-10	13
				47	2020-06-25	13				63	2020-11-06	10		101	101	2021-03-05	10
				47	2020-06-25	13			105	105	2021-03-24	13			101	2021-03-05	10
				47	2020-06-25	13				105	2021-03-24	13			101	2021-03-05	10
				47	2020-06-25	13			107	107	2021-04-01	13			101	2021-03-05	10
				47	2020-06-25	13				107	2021-04-01	13		102	102	2021-03-05	10
				47	2020-06-25	13			108	108	2021-04-01	12			102	2021-03-05	10
				47	2020-06-25	13				108	2021-04-01	12			102	2021-03-05	10
				47	2020-06-25	13				108	2021-04-01	13			102	2021-03-05	10
			49	49	2020-07-02	12				108	2021-04-01	11			96	2021-03-10	10
				49	2020-07-02	12			109	109	2021-04-07	12			96	2021-03-10	10
				49	2020-07-02	12			110	110	2021-04-07	11			96	2021-03-10	10
				49	2020-07-02	12				110	2021-04-07	11			98	2021-03-10	6
			51	51	2020-07-09	11				110	2021-04-07	11			98	2021-03-10	6
				51	2020-07-09	11				110	2021-04-07	12			98	2021-03-10	10
				51	2020-07-09	11				110	2021-04-07	13			98	2021-03-10	10
				51	2020-07-09	11			113	113	2021-04-14	12			98	2021-03-10	10
				51	2020-07-09	11			112	112	2021-04-26	13		103	103	2021-03-17	13
				51	2020-07-09	11				112	2021-04-26	13			103	2021-03-17	13
				51	2020-07-09	11				113	2021-04-26	12			103	2021-03-17	13
				51	2020-07-09	11				113	2021-04-26	13			103	2021-03-17	13
				51	2020-07-09	11				113	2021-04-26	12			103	2021-03-17	13
			52	52	2020-07-17	13				113	2021-04-26	12			103	2021-03-17	13
				52	2020-07-17	13				113	2021-04-26	12			103	2021-03-17	13
				52	2020-07-17	13				113	2021-04-26	12			103	2021-03-17	13
				52	2020-07-17	13			114	114	2021-04-26	12			103	2021-03-17	13
				52	2020-07-17	13			115	115	2021-04-26	10			103	2021-03-17	13
				52	2020-07-17	13				115	2021-04-26	10			103	2021-03-17	13
			54	54	2020-07-23	11				115	2021-04-26	10			103	2021-03-17	13
				54	2020-07-23	11				115	2021-04-26	10			103	2021-03-17	13
				54	2020-07-23	11				115	2021-04-26	10			103	2021-03-17	13
				54	2020-07-23	11				115	2021-04-26	12		104	104	2021-03-17	13
				54	2020-07-23	11				115	2021-04-26	12			104	2021-03-17	13
				54	2020-07-23	11				115	2021-04-26	12			104	2021-03-17	13
			56	56	2020-07-31	13				115	2021-04-26	12			104	2021-03-17	13
				56	2020-07-31	13				112	2021-04-28	13			104	2021-03-17	13
				56	2020-07-31	13				112	2021-04-28	13			104	2021-03-17	13
				56	2020-07-31	13				112	2021-04-28	11			104	2021-03-17	13
				56	2020-07-31	13				115	2021-04-28	13			104	2021-03-17	13
				56	2020-07-31	13				115	2021-04-28	13			104	2021-03-17	13
				56	2020-07-31	13				115	2021-04-28	13			104	2021-03-17	13
				56	2020-07-31	13				112	2021-05-03	11		105	105	2021-03-24	12
				56	2020-07-31	13				112	2021-05-03	13
				56	2020-07-31	13				115	2021-05-03	10				Mean	12.2269
				56	2020-07-31	13				115	2021-05-03	12				Count	119
			59	59	2020-07-31	12				115	2021-05-03	12				STDEV	1.26516
				59	2020-07-31	12				115	2021-05-03	12				SEM	0.115977
				59	2020-07-31	12				115	2021-05-03	12
				59	2020-08-07	13			114	114	2021-05-05	13
				59	2020-08-07	13				114	2021-05-05	13
				59	2020-08-07	13				114	2021-05-05	13
				59	2020-08-07	8				114	2021-05-05	13
				59	2020-08-07	8				114	2021-05-05	13
				59	2020-08-07	8				114	2021-05-05	11
				59	2020-08-07	8				114	2021-05-05	11
				59	2020-08-07	13				114	2021-05-05	11
				59	2020-08-07	13				114	2021-05-05	11
				59	2020-08-07	13				114	2021-05-05	11
				59	2020-08-07	13				114	2021-05-05	11
				59	2020-08-07	13				114	2021-05-05	11
				59	2020-08-07	13				114	2021-05-05	11
				59	2020-08-07	13				114	2021-05-05	11
				59	2020-08-07	13				114	2021-05-05	11
				59	2020-08-07	13				114	2021-05-05	11
				59	2020-08-07	9				114	2021-05-05	11
				59	2020-08-07	9				114	2021-05-05	11
				59	2020-08-07	9				114	2021-05-05	11
				59	2020-08-07	9				114	2021-05-05	11
			61	61	2020-08-20	12			116	116	2021-05-05	12
				61	2020-08-20	12				116	2021-05-05	12
				61	2020-08-20	12				116	2021-05-05	12
				61	2020-08-20	12				116	2021-05-05	12
			62	62	2020-08-20	12				113	2021-05-27	13
				62	2020-08-20	12				113	2021-05-27	13
				62	2020-08-20	12				113	2021-05-27	13
				62	2020-08-20	12				113	2021-05-27	13
				62	2020-08-20	12				113	2021-05-27	13
				62	2020-08-20	12				113	2021-05-27	13
				62	2020-08-20	11				113	2021-05-27	13
				62	2020-08-20	11				113	2021-05-27	13
				62	2020-08-20	11				113	2021-05-27	13
				62	2020-08-20	11				113	2021-05-27	13
			63	63	2020-08-26	3				113	2021-05-27	13
				63	2020-08-26	3			118	118	2021-06-09	13
				63	2020-08-26	3				118	2021-06-09	13
										118	2021-06-09	13
					Mean	10.8519				118	2021-06-09	13
					Count	162				118	2021-06-09	13
					STDEV	2.64275				118	2021-06-09	13
					SEM	0.207634				118	2021-06-09	13
										118	2021-06-09	13
									119	119	2021-06-09	13
										119	2021-06-09	13
										119	2021-06-09	13
										119	2021-06-09	13
										119	2021-06-09	13
										119	2021-06-09	13
										119	2021-06-09	13
										119	2021-06-09	13
										119	2021-06-09	13
										119	2021-06-09	13
									120	120	2021-06-18	13
										120	2021-06-18	13
										120	2021-06-18	13
										119	2021-06-22	13
										119	2021-06-22	13
										119	2021-07-08	13
										119	2021-07-08	13
										119	2021-07-08	13
										119	2021-07-08	13
										119	2021-07-08	13
										119	2021-07-08	13
										119	2021-07-08	13
										119	2021-07-08	13
										119	2021-07-08	13
										119	2021-07-08	13
										119	2021-07-08	13
										119	2021-07-08	13
										119	2021-07-08	13
										119	2021-07-08	13
										116	2021-07-12	13
										116	2021-07-12	13
									123	123	2021-07-21	12
										123	2021-07-21	12
										123	2021-07-21	12
										123	2021-07-21	12
										123	2021-07-21	12
									125	125	2021-07-21	13
										125	2021-07-21	13
										125	2021-07-21	13
										125	2021-07-21	13
										125	2021-07-21	13
										125	2021-07-21	13
										116	2021-07-26	13
										114	2021-08-02	12
										114	2021-08-02	12
										118	2021-08-02	13
										118	2021-08-02	13
										118	2021-08-02	13
									127	127	2021-08-09	13
										127	2021-08-09	13
										127	2021-08-09	13
										127	2021-08-09	13
										127	2021-08-09	13
										127	2021-08-09	12
										127	2021-08-09	12
										127	2021-08-09	12
									129	129	2021-08-11	11
										129	2021-08-11	11
										129	2021-08-11	11
										129	2021-08-11	11
										129	2021-08-11	11
										129	2021-08-11	11
										129	2021-08-11	11
										129	2021-08-11	11
										129	2021-08-11	11
									131	131	2021-08-12	13
										131	2021-08-12	13
										131	2021-08-12	13
										131	2021-08-12	13
										131	2021-08-12	13
										131	2021-08-12	13
										131	2021-08-12	13
										131	2021-08-12	13
									132	132	2021-08-12	13
										132	2021-08-12	13
										132	2021-08-12	13
											Mean	11.8402
											Count	244
											STDEV	1.34373
											SEM	0.0860238

## Sheet: Fig 3 Summary
F
